# Supplementary material for: Visualization of the Serratia Type VI Secretion System Reveals Unprovoked Attacks and Dynamic Assembly
Source: PubMed Central journal article supplement (PMC4594159; doi:10.1016/j.celrep.2015.08.053), 2015-09-17
Supplement: mmc1.pdf [file mmc1.pdf]

Cell Reports

Supplemental Information

**Visualization of the *Serratia* Type VI Secretion  
System Reveals Unprovoked Attacks  
and Dynamic Assembly**

Amy J. Gerc, Andreas Diepold, Katharina Trunk, Michael Porter, Colin Rickman, Judith  
P. Armitage, Nicola R. Stanley-Wall, and Sarah J. Coulthurst

**Figure S1**

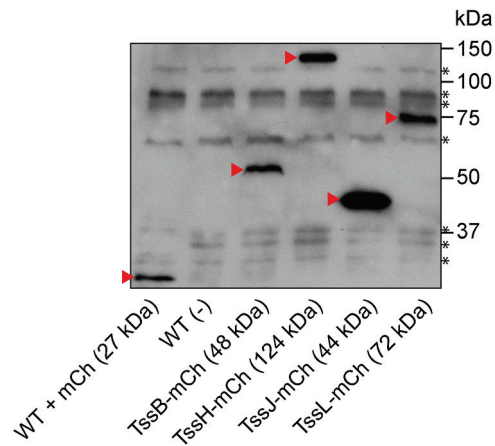

**Figure S1. Confirmation of the integrity of chromosomally-encoded fusion proteins of Type VI secretion system components with mCherry, related to Figure 1.**

Total cellular fractions of wild type *Serratia marcescens* Db10 (WT) and derivatives expressing fusions of mCherry to the C-terminus of TssB (TssB-mCh), TssH (TssH-mCh), TssJ (TssJ-mCh) or TssL (TssL-mCh) were subjected to immunoblotting using anti-mCherry antisera. A positive control is provided by the WT expressing mCherry from a plasmid (WT + mCh). The predicted molecular weight of each protein is given in parentheses. The mCherry fusion proteins are highlighted with red arrowheads and the positions of non-specific bands are indicated by asterisks on the right hand side.

**Figure S2**

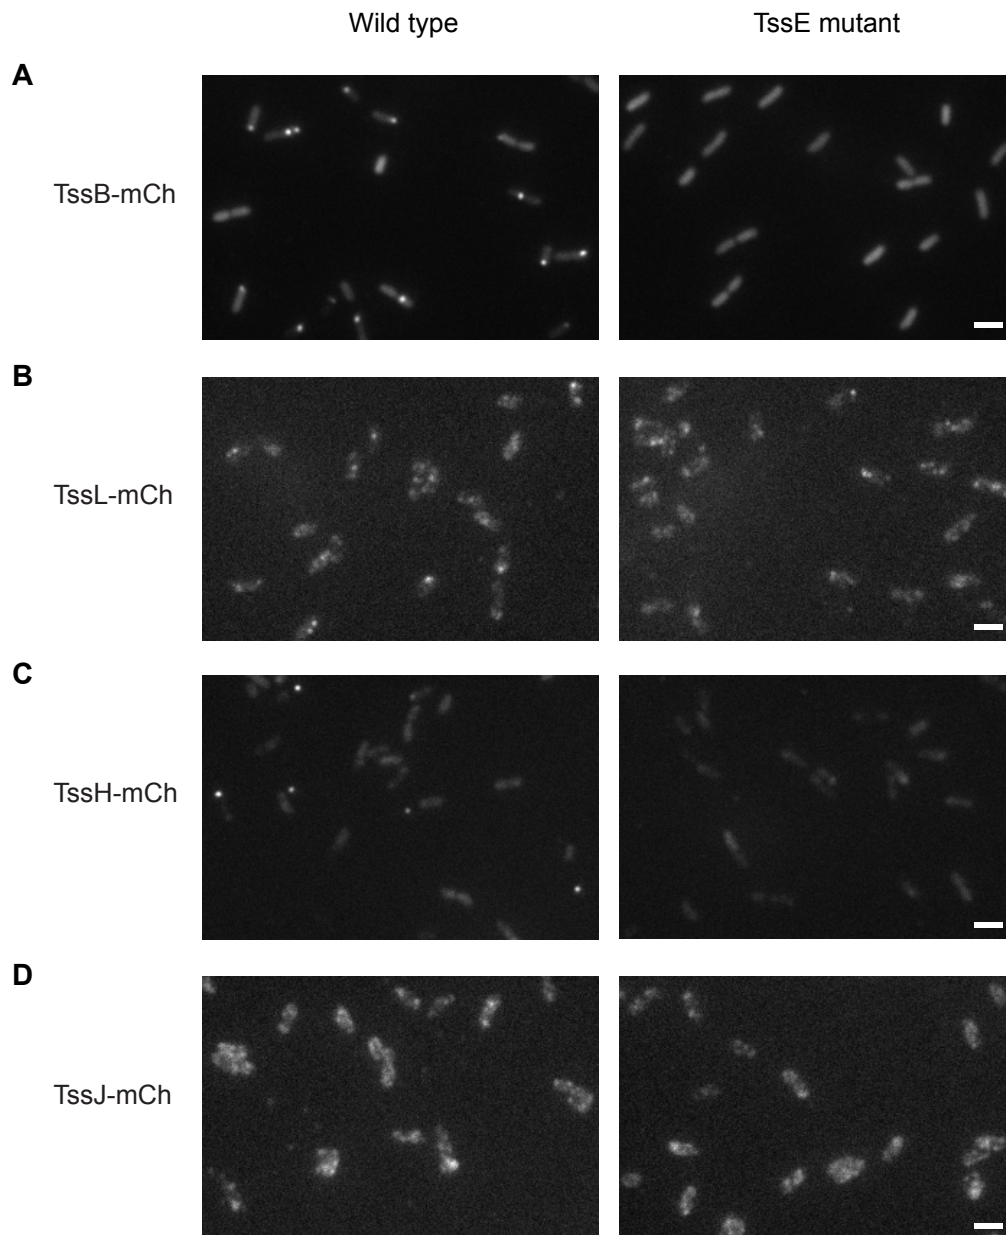

**Figure S2. Localisation of TssB, TssH, TssJ and TssL in the absence of the essential baseplate protein TssE, related to Figure 4.**

Representative fluorescence images of cells of *Serratia marcescens* Db10 expressing chromosomally-encoded fusion proteins TssB-mCh (A), TssL-mCh (B), TssH-mCh (C) or TssJ-mCh (D), in either a wild type (left) or  $\Delta tssE$  mutant (right) background; scale bar, 2  $\mu\text{m}$ .

## Legends for Supplemental Movies

**Movie S1. Fluorescence time course of TssB-mCherry during microcolony development, related to Figure 2.**

Images were acquired at 10 min intervals for a total period of 6 hours, for the field of view containing the cells shown in Fig. 2. Left panel, DIC images; middle panel, corresponding fluorescence images (mCherry channel); right panel, false-coloured merge of DIC images (greyscale) and fluorescence images (mCherry, red).

**Movie S2. Fluorescence time course of TssB-mCherry, related to Figure 4E.**

Images were acquired at 10 s intervals for 4 minutes.

**Movie S3. Fluorescence time course of TssH-mCherry, related to Figure 4F.**

Images were acquired at 10 s intervals for 4 minutes.

**Table S1. Bacterial strains used in this study, related to Experimental Procedures**

| Strain                       | Description                                                                                                                                              | Source or Reference                      |
|------------------------------|----------------------------------------------------------------------------------------------------------------------------------------------------------|------------------------------------------|
| <i>S. marcescens</i> Db10    | Wild type strain                                                                                                                                         | (Flyg et al., 1980; Iguchi et al., 2014) |
| SJC3                         | Db10 $\Delta tssH$ ( $\Delta$ SMDB11_2274)                                                                                                               | (Murdoch et al., 2011)                   |
| SJC11                        | Db10 $\Delta tssE$ ( $\Delta$ SMDB11_2271)                                                                                                               | (Murdoch et al., 2011)                   |
| SAN157                       | Db10 <i>tssJ-mCherry</i> (TssJ-mCh translational fusion; TssJ, SMDB11_2252)                                                                              | This study                               |
| SAN159                       | Db10 <i>tssH-mCherry</i> (TssH-mCh translational fusion; TssH, SMDB11_2274)                                                                              | This study                               |
| SAN162                       | Db10 <i>tssL-mCherry</i> (TssL-mCh translational fusion; TssL, SMDB11_2254)                                                                              | This study                               |
| SAN163                       | Db10 <i>tssB-mCherry</i> (TssB-mCh translational fusion; TssB, SMDB11_2258)                                                                              | This study                               |
| SAN199                       | Db10 <i>tssB-mCherry</i> , $\Delta lacZ::P_{T5}$ - <i>gfpmut2-kan<sup>R</sup> (TssB-mCh translational fusion and cytoplasmic GFP; LacZ, SMDB11_2462)</i> | This study                               |
| SAN207                       | Db10 <i>tssB-gfpmut2</i> ; TssB-GFP translational fusion                                                                                                 | This study                               |
| SAN208                       | Db10 <i>tssB-gfpmut2</i> , <i>tssJ-mCherry</i> (dual reporter fusion strain)                                                                             | This study                               |
| SAN209                       | Db10 <i>tssB-gfpmut2</i> , <i>tssH-mCherry</i> (dual reporter fusion strain)                                                                             | This study                               |
| SAN210                       | Db10 <i>tssB-gfpmut2</i> , <i>tssL-mCherry</i> (dual reporter fusion strain)                                                                             | This study                               |
| KT24                         | Db10 $\Delta T6SS$ ( $\Delta$ SMDB11_2244-SMDB11_2281), Sm-resistant                                                                                     | (English et al., 2012)                   |
| KT153                        | Db10 <i>tssJ-mCherry</i> , $\Delta tssE$                                                                                                                 | This study                               |
| KT154                        | Db10 <i>tssH-mCherry</i> , $\Delta tssE$                                                                                                                 | This study                               |
| KT155                        | Db10 <i>tssL-mCherry</i> , $\Delta tssE$                                                                                                                 | This study                               |
| KT156                        | Db10 <i>tssB-mCherry</i> , $\Delta tssE$                                                                                                                 | This study                               |
| <i>S. marcescens</i> ATCC274 | Wild type strain                                                                                                                                         | Lab stock                                |
| SJC44                        | ATCC274 $\Delta tssE$                                                                                                                                    | This study                               |
| KT81                         | Sm-resistant derivative of ATCC274                                                                                                                       | This study                               |
| KT82                         | Sm-resistant derivative of SJC44                                                                                                                         | This study                               |
| <i>P. fluorescens</i> KT02   | Sm-resistant derivative of <i>Pseudomonas fluorescens</i> 55                                                                                             | (Murdoch et al., 2011)                   |

**Supplemental Reference**

Flyg, C., Kenne, K., and Boman, H.G. (1980). Insect pathogenic properties of *Serratia marcescens*: phage-resistant mutants with a decreased resistance to *Cecropia* immunity and a decreased virulence to *Drosophila*. *J Gen Microbiol* 120, 173-181.
